# Supplementary material for: Bt proteins Cry1Ah and Cry2Ab do not affect cotton aphid Aphis gossypii and ladybeetle Propylea japonica
Source: Sci Rep. 2016 Feb 1;6:20368. doi: 10.1038/srep20368 (PMC4734323; doi:10.1038/srep20368)
Supplement: Supplementary Information [file srep20368-s1.pdf]

## Supplementary Information

### ***Bt* proteins Cry1Ah and Cry2Ab do not affect cotton aphid *Aphis gossypii* and ladybeetle *Propylea japonica***

Yao Zhao<sup>1,2</sup>, Shuai Zhang<sup>2</sup>, Jun-Yu Luo<sup>2</sup>, Chun-Yi Wang<sup>2</sup>, Li-Min Lv<sup>2</sup>, Xiao-Ping Wang<sup>1</sup>, Jin-Jie Cui<sup>2,\*</sup> & Chao-Liang Lei<sup>1,\*</sup>

<sup>1</sup>Hubei Insect Resources Utilization and Sustainable Pest Management Key Laboratory, Huazhong Agricultural University, Wuhan 430070, China, <sup>2</sup>State Key Laboratory of Cotton Biology, Institute of Cotton Research of CAAS, Anyang 455000, China.

\*Correspondence and requests for materials should be addressed to C.-L.L. (ioir@mail.hzau.edu.cn) or J.-J.C. (cuijinjie@126.com)

**This Supplementary Information contains:**

**Supplementary Methods**

**Supplementary Tables S1-S2**

## 20    **Supplementary Methods**

21    **The stability of the Cry2Ab protein in the artificial diets.** The stability of the  
22    Cry2Ab protein in the artificial diets was measured with an enzyme-linked  
23    immuno-sorbent assay (ELISA) using the Cry2Ab detection kit (EnviroLogix Inc.,  
24    Portland, ME, USA). The samples for ELISA measurements were collected from: 1)  
25    fresh diets, 2) diets that had been stored at 4°C for 24h and provided to *P. japonica*  
26    next day. For Cry protein extraction, samples of artificial diets were weighed and  
27    homogenized with PBST buffer at a ratio of 1:200 (sample [mg]: buffer [μl]). After  
28    centrifugation and appropriate dilution of the supernatants, ELISA was performed  
29    according to the manufacturer's instructions. The optical density (OD) values were  
30    read with a microplate spectrophotometer (Synergy 2, BioTek, USA). The measured  
31    OD values were calibrated to a range of Cry2Ab concentrations made from purified  
32    protein solution.

33    **Data analyses.** Pair-wise statistical comparisons were made between the Cry protein  
34    or E-64 treatment and the control treatment. Data analyzed with ANOVA were first  
35    checked whether they satisfy the assumptions for parametric analyses (normal  
36    distribution of residuals and homogeneity of error variances). One-way ANOVA and  
37    Dunnett's tests were used to analyse the weights of newly emerged adults of aphids  
38    and ladybeetles. Mann–Whitney *U* tests were used to compare the developmental  
39    periods, and  $\chi^2$  tests were used to compare the mortality rates because such data did  
40    not satisfy the assumptions for parametric analyses. Student's *t*-tests were conducted  
41    to compare Cry protein concentrations in samples from: fresh diets; diets that had  
42    been stored at 4°C for 24h and provided to *P. japonica* next day. One-way ANOVA  
43    and Tukey's Honestly Significant Difference (HSD) tests were performed to analyse  
44    the qRT-PCR data.

The nutrition utilization data for *P. japonica* were analysed using an analysis of covariance (ANCOVA) with the initial weight as a covariate for RCR and RGR, whereas food consumption was a covariate for ECI and AD to correct for the effect of variation on the growth and food assimilated on intake and growth<sup>61</sup>. Food assimilation [i.e., artificial diets ingested (mg) - frass produced (mg)] was also used as a covariate to analyse the ECD parameter<sup>62</sup>. The assumption of a parallel slope between covariate and dependent variable was satisfied for each analysis. Means were separated using LSD tests.

All of the statistical analyses were conducted with SPSS 17.0 (SPSS Inc., Chicago, IL, USA.).

## References

61. Raubenheimer, D. & Simpson, S. Analysis of covariance: an alternative to nutritional indices. *Entomol. Exp. Appl.* **62**, 221-231 (1992).
62. Hägele, B. F. & Rowell-Rahier, M. Dietary mixing in three generalist herbivores: nutrient complementation or toxin dilution? *Oecologia* **119**, 521-533 (1999).

**63** Supplementary Table S1 Primers sequences used for qRT-PCR of *A. gossypii*

| Gene name                                        | Accession number | Primer sequence (5'-3')                                               |
|--------------------------------------------------|------------------|-----------------------------------------------------------------------|
| dimethyladenosine transferase <sup>a</sup>       | KF018923         | Sense: CCAAGCCAGGAGACAAACTAT<br>Antisense: CGAGGTTCTATACGCACTACATT    |
| peptidyl-prolyl cis-trans isomerase <sup>a</sup> | KF018924         | Sense: ATTGAAACTCGCCCAGATGT<br>Antisense: ATCACCAGTAATCACAGATTCTCC    |
| cytochrome P450 6a2 <sup>a</sup>                 | KR028422         | Sense: GGAGAACGATGCGACAGAA<br>Antisense: TTCAGACCGAAAGCCGATG          |
| cytochrome P450 6a13 <sup>a</sup>                | KR028423         | Sense: AATTGTTGATGTGAGTGAAGCAG<br>Antisense: TACGACGAAATTCTGAATCTGGAT |
| cytochrome P450 6a14 <sup>a</sup>                | KR028424         | Sense: GTACGACGGTCACAGAGAAC<br>Antisense: CTCCACATCCTTGTAACATTCCTA    |
| glutathione S-transferase delta 1 <sup>a</sup>   | KR028425         | Sense: GCAATCATCGTGTACTTGGTTC<br>Antisense: TTTCGGCACTCCAGCAA         |
| carboxylesterases <sup>b</sup>                   | AY485218         | Sense: CATAACCCTACGCTCAACCAC<br>Antisense: GCAATCTTCACTTCCAACGA       |
| glutamine synthetase 2 <sup>a</sup>              | KR028426         | Sense: AAGAGTTTGGCGTTGTGGTA<br>Antisense: GCTTGAGTTGAGAAATTACAGTGG    |
| glycine cleavage system h protein <sup>a</sup>   | KR028427         | Sense: TATGCTGAGCTACCTTCTGTTG<br>Antisense: TTTATCAATGCTGGTCTTGTTCC   |
| phenylalanine hydroxylase <sup>a</sup>           | KR028428         | Sense: TGTGTTGGTGGGCTTCTTTCTT<br>Antisense: CTGTGATGTCTGATGTACTGTGT   |
| phosphoserine aminotransferase <sup>a</sup>      | KR028429         | Sense: GGAGGTCTTGTTGCTATGGAA<br>Antisense: AATGGCACGGTTATACGACTT      |
| cationic amino acid transporter 2 <sup>a</sup>   | KR028430         | Sense: CGCCAGGAGGATTCAGTG<br>Antisense: GACACGAACACCAGCAGTA           |

**64** <sup>a</sup>Primers cited from this study.

**65** <sup>b</sup>Primers cited from Gong et al., 2014<sup>54</sup>.

**66**

**67**

68      Supplementary Table S2    Primers sequences used for qRT-PCR of *P. japonica*

| Gene name                                         | Primer sequence (5'-3')                                       |
|---------------------------------------------------|---------------------------------------------------------------|
| $\beta$ -actin <sup>a</sup>                       | Sense: GTTACTCTTTCACCACCACA<br>Antisense: GGGCAACGGAATCTTT    |
| cytochrome P450 CYP345B1 <sup>a</sup>             | Sense: TGCCATACAGACGACTTG<br>Antisense: TCCTTCATTGTCCTCCA     |
| cytochrome P450 CYP4Q2 <sup>a</sup>               | Sense: ATTTGCGAAGAGGTTGA<br>Antisense: CGTAAGATGGGTGTTTCAT    |
| cytochrome P450 CYP6BQ13 <sup>a</sup>             | Sense: TTCTTAGCGGGTTTCG<br>Antisense: ATGGCTTCATAAGTAATCCTAC  |
| cytochrome P450 CYP9F2 <sup>a</sup>               | Sense: AGAGCCCAACTATGAAGC<br>Antisense: GATATGCCCACGGAGC      |
| glutathione <i>S</i> -transferase <sup>a</sup>    | Sense: ACCTCAAAGACCCTTATTACC<br>Antisense: TCTCCACAGCCCGAAA   |
| microsomal glutathione s-transferase <sup>a</sup> | Sense: TTTGACTGAACCCAGCGTAG<br>Antisense: GGCGAAACCAATCGTATGT |
| juvenile hormone esterase <sup>a</sup>            | Sense: GATGCCAGTTTCCCTAT<br>Antisense: TTTCTATCTTTCCCTCCA     |
| alpha-esterase <sup>a</sup>                       | Sense: CAGGTGGAGCGTCAGTT<br>Antisense: TTGGGCTATTGCTTTGTG     |

69      <sup>a</sup>Primers cited from Tang et al., 2014<sup>48</sup>.

70

71

72
